# Supplementary material for: Drying-Time Study in Graphene Oxide
Source: MDPI journal article supplement (doi:10.3390/nano11041035), 2021-04-19
Supplement: s1 [file s1]

# Drying-time study in graphene oxide

Talia Tene, Marco Guevara, Andrea Valarezo, Orlando Salguero, Fabian Arias Arias, Melvin Arias, Andrea Scarcello, Lorenzo S. Caputi and Cristian Vacacela Gomez

## Supplementary Figures

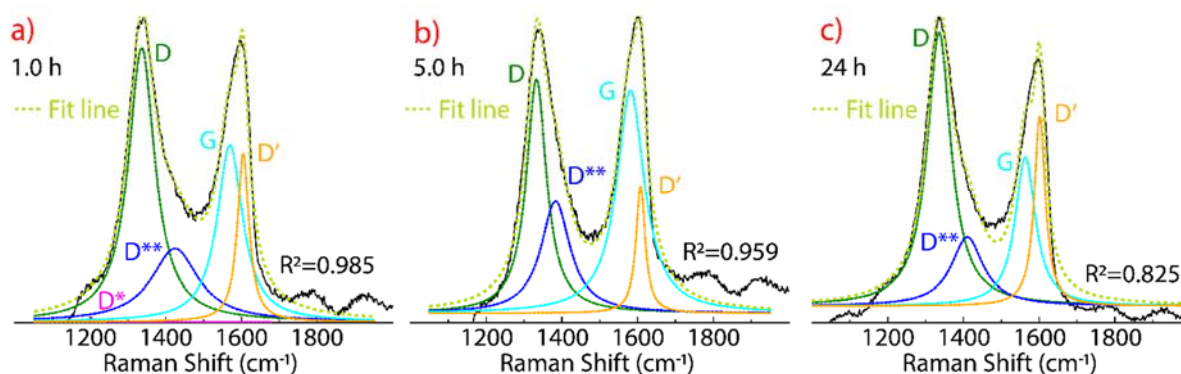

**Figure S1.** Raman spectra of rehydrated GO samples (1 h, 5 h, 24 h) from 1000 to 2000  $\text{cm}^{-1}$  recorded using 532 excitation laser. The intensity was normalized by the most intense peak and the fitting of the peaks using Lorentzian functions.

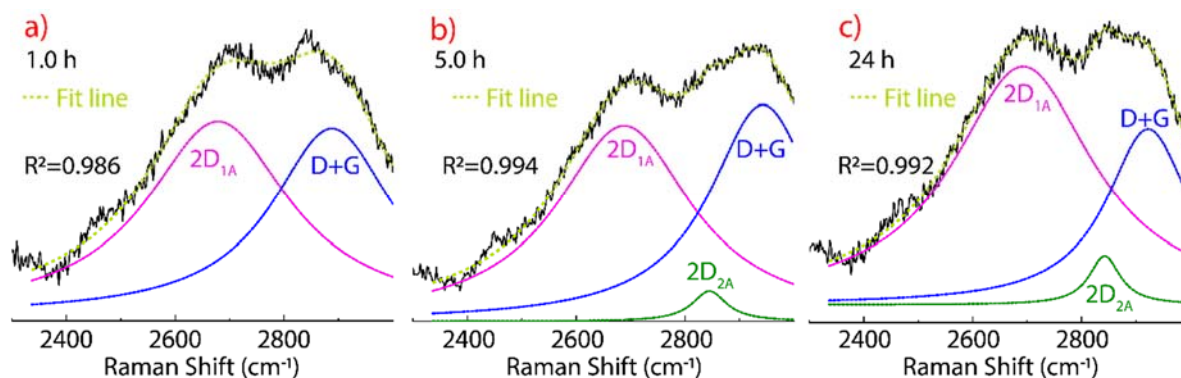

**Figure S2.** Raman spectra of rehydrated GO samples (1 h, 5 h, 24 h) from 2300 to 3000  $\text{cm}^{-1}$  recorded using 532 excitation laser. The intensity was normalized by the most intense peak and the fitting of the peaks using Lorentzian functions.

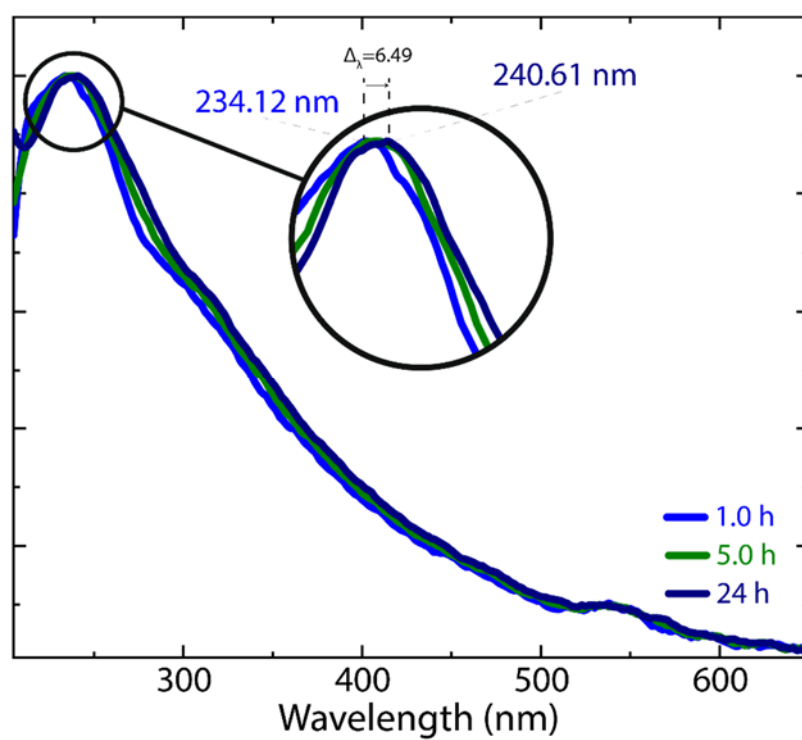

**Figure S3.** UV-vis spectra of rehydrated GO samples (1 h, 5 h, 24 h).
